# Supplementary material for: Application of 2′-OMethylRNA′ Antisense Oligomer to Control Candida albicans EFG1 Virulence Determinant
Source: PubMed Central journal article supplement — Mol Ther Nucleic Acids. 2019 Sep 26;18:508–17. doi: 10.1016/j.omtn.2019.09.016 (PMC6838528; doi:10.1016/j.omtn.2019.09.016), 2019-09-26
Supplement: mmc1.pdf [file mmc1.pdf]

OMTN, Volume 18

## Supplemental Information

**Application of 2'-OMethylRNA' Antisense**

**Oligomer to Control *Candida albicans***

***EFG1* Virulence Determinant**

**Daniela Araújo, Nuno Miguel Azevedo, Ana Barbosa, Carina Almeida, Maria Elisa Rodrigues, Mariana Henriques, and Sónia Silva**

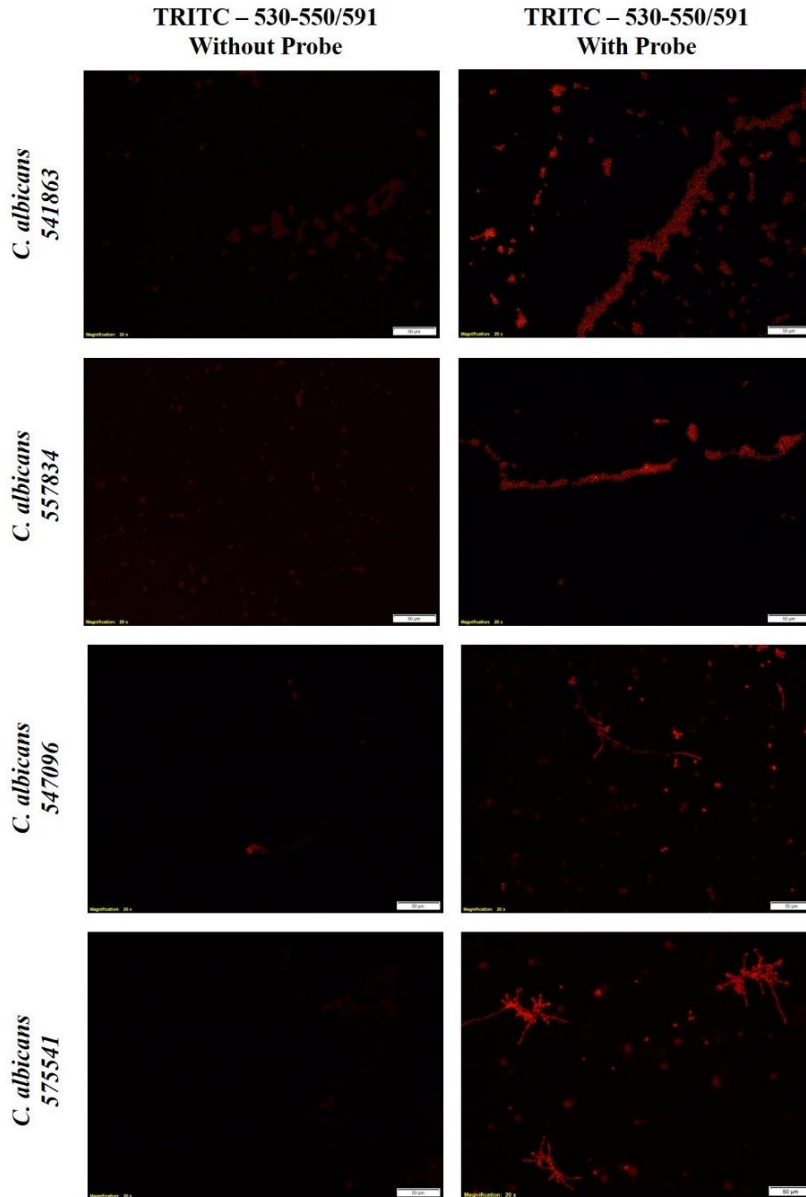

1

2 **Supplementary material 1. Anti-*EFG1* 2'OMe *Candida albicans* strains sensitivity obtained by**  
3 **fluorescence *in situ* hybridization (FISH).** The images were obtained by epifluorescence  
4 microscopy with the same exposure time for cells incubated in absence and presence of ASO.  
5 The values of exposure time used varied between 32.05 ms and 340.7 ms. Negative controls  
6 were prepared only with 20  $\mu$ L of hybridization solution without probe.

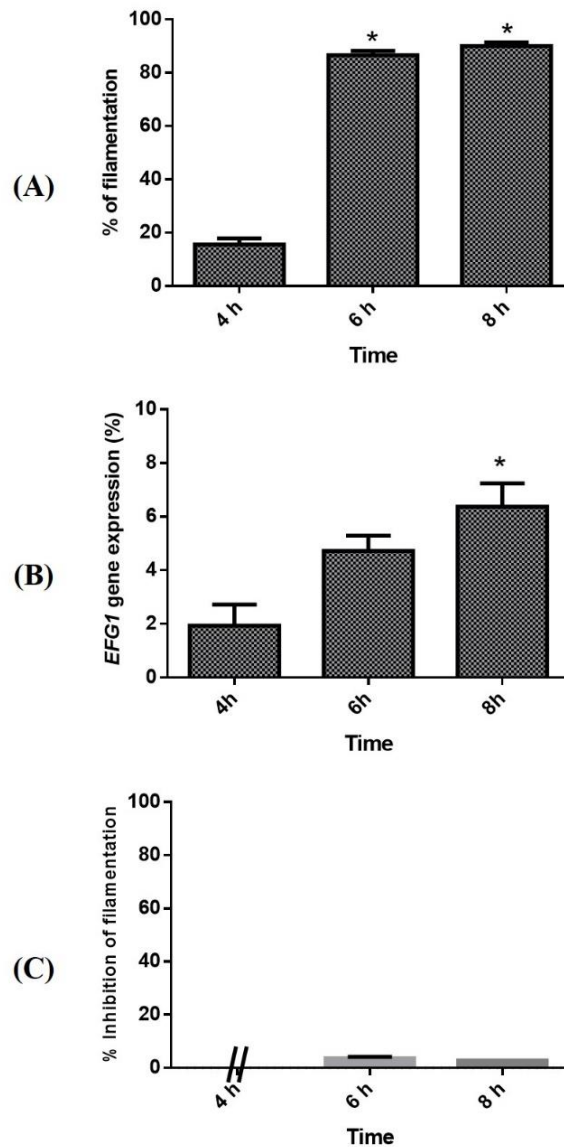

7

8 **Supplementary material 2.** (A) Percentage of filamentous forms (%) of *Candida albicans*  
 9 SC5314 at different time points (4, 6 and 8 h) in RPMI (Without ASO); (B) Percentage of *EFG1*  
 10 gene expression obtained from *Candida albicans* SC5314 at different time points (4, 6 and 8 h)  
 11 and (C) Percentage of inhibition of filamentous forms (%) at different time points (4, 6 and 8  
 12 h) with 40 nM of scrambled ASO in RPMI. Error bars represent standard deviation.  
 13 \*Significantly differences between 4 h and the other times tested ( $p < 0.05$ ).

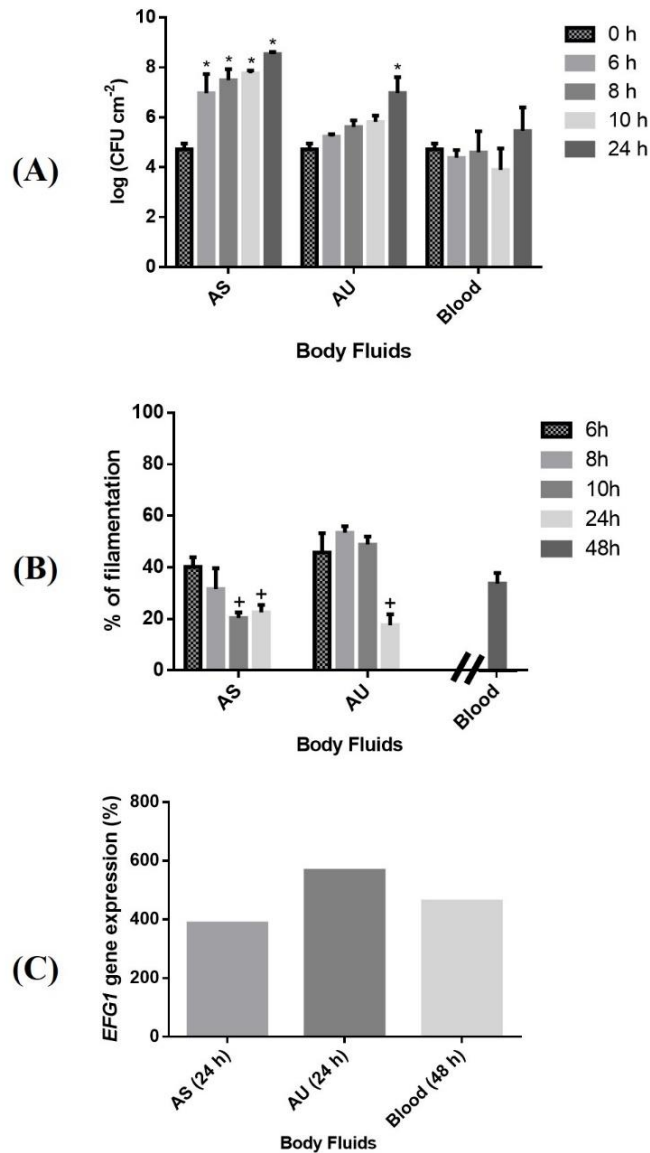

14

15 **Supplementary material 3. (A)** Number of cultivable cells (log CFUs cm<sup>-2</sup>) at different time points  
 16 (0, 6, 8, 10 and 24 h); **(B)** Percentage of filamentous forms (%) at different time points (6, 8, 10,  
 17 24 and 48 h) and **(C)** Percentage of *EFG1* gene expression in different simulated human body  
 18 fluids (AS, AU at 24 h and horse blood at 48 h); without ASO obtained from *Candida albicans*  
 19 SC5314. Error bars represent standard deviation. \*Significantly differences between 0 h and  
 20 the other times tested (p<0.05). + Significantly differences between 6 h and the other times  
 21 tested (p<0.05).
